# Supplementary material for: Gram-scale synthesis of single-crystalline graphene quantum dots derived from lignin biomass
Source: Royal Society of Chemistry journal article supplement (doi:10.1039/c7gc03218h), 2018-01-01
Supplement: c7gc03218h1.pdf [file c7gc03218h1.pdf]

Supporting online materials for

**Gram-scale synthesis of single-crystalline graphene  
quantum dots derived from lignin biomass**

Zheyuan Ding, Fengfeng Li, Jialong Wen, Xiluan Wang\* and Runcang Sun

*Beijing Key Laboratory of Lignocellulosic Chemistry, Beijing Forestry University,  
Beijing, 100083, P. R. China.*

*\*Corresponding author: Tel: +86-10-62336903; Fax: +86-10-62336903*

*E-mail address: wangxiluan@bjfu.edu.cn*

**Contents:**

**Fig. S1—S5**

**Table 1 and 2**

**Supplementary References S1—S21**

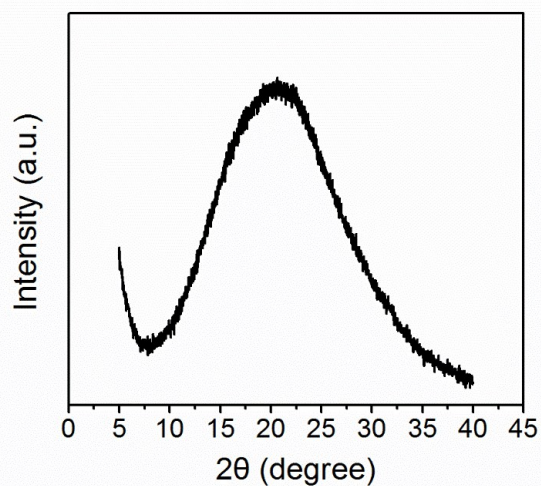

**Figure S1.** XRD pattern of AL.

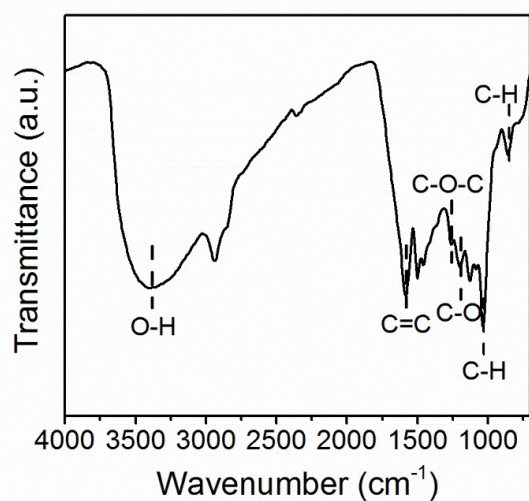

**Figure S2.** FT-IR analysis of AL.

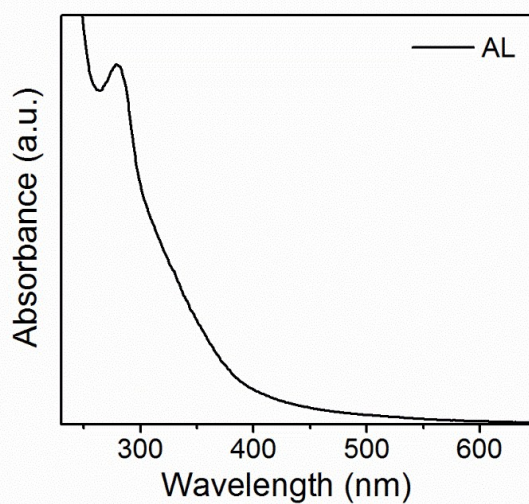

**Figure S3.** UV-vis spectrum of AL.

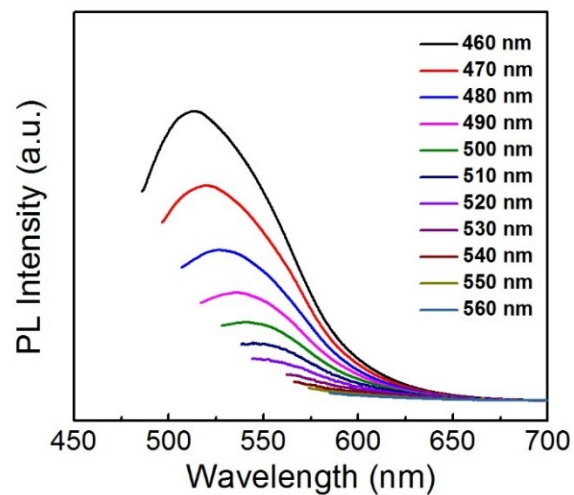

**Figure S4.** PL emission spectra with excitation wavelength from 460 to 560 nm.

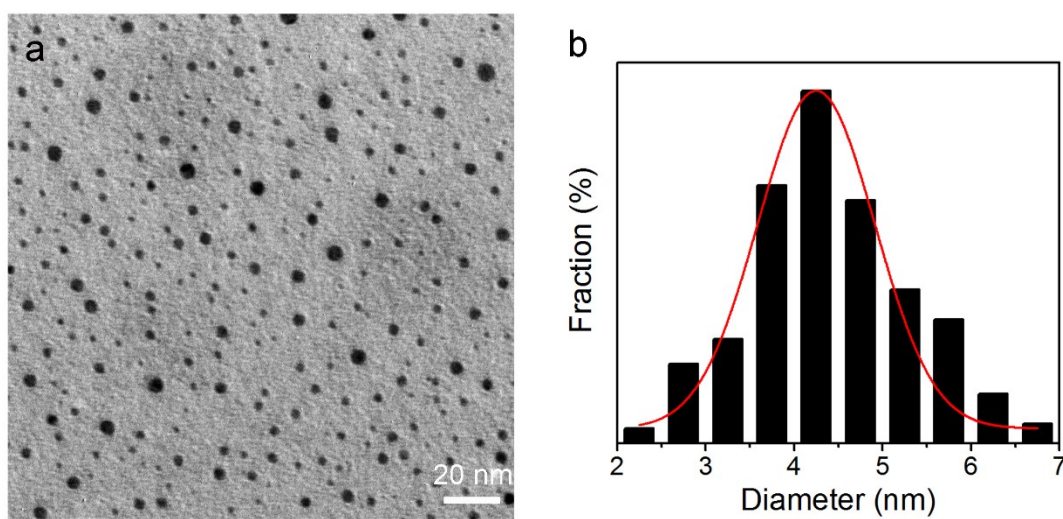

**Figure S5.** (a) TEM image and (b) size distribution of GQDs with average lateral size of 4.4 nm.

**Table 1.** Summary of biomass-based carbon quantum dots

| Precursor                  | Synthetic Method                                            | Quantum Yield (%) | Reference |
|----------------------------|-------------------------------------------------------------|-------------------|-----------|
| Urine                      | Carbonization at 200 °C                                     | 5.3               | 1         |
| Orange juice               | Hydrothermal treatment at 120 °C                            | 26                | S1        |
| Food waste                 | Ultrasound irradiation (40 kHz)                             | 2.85              | 37        |
| Garlic                     | Hydrothermal treatment at 200 °C                            | 17.5              | 2         |
| Orange peel                | Hydrothermal treatment at 180 °C                            | 36                | 36        |
| Glucose                    | Hydrothermal treatment at 200 °C                            | 1.1-2.4           | S2        |
| Grass                      | Hydrothermal treatment at 150–200 °C                        | 2.5-6.2           | S3        |
| Hemicellulose              | Hydrothermal treatment at 200 °C                            | 16.18             | S4        |
| Soybean                    | Carbonization at 200 °C                                     | 3.17              | S5        |
| Carbon soot                | HNO <sub>3</sub> oxidation at 100 °C                        | 3                 | S6        |
| Rice husk                  | Ultrasonic treatment                                        | 8.1               | 33        |
| Watermelon peel            | Carbonization at 220 °C                                     | 7.1               | S7        |
| Peanut shell               | Carbonization at 250 °C                                     | 9.91              | S8        |
| Waste paper                | Hydrothermal treatment at 150–200 °C                        | 7.4-11.7          | S9        |
| Soy milk                   | Hydrothermal treatment at 180 °C                            | 2.6               | S10       |
| dead neem leaves           | H <sub>2</sub> SO <sub>4</sub> , HNO <sub>3</sub> treatment | 2                 | 34        |
| Sago waste                 | Carbonization at 250–450 °C                                 | —                 | 35        |
| Coconut water              | Microwave irradiation (800 W)                               | 2.8               | S11       |
| Coffee                     | Stirring at 90 °C                                           | 5.5               | S12       |
| Calcium alginate           | Hydrothermal treatment                                      | —                 | S13       |
| Lignin                     | Hydrothermal treatment at 180 °C                            | —                 | S14       |
| Cellulolytic enzyme lignin | Stirring at room temperature                                | 2.47              | S15       |
| Alkali lignin              | Two-step method                                             | 22                | Our work  |

**Table 2.** Summary of graphene quantum dots

| Precursor                    | Synthetic Method                                                                     | Quantum Yield (%) | Reference |
|------------------------------|--------------------------------------------------------------------------------------|-------------------|-----------|
| Carbon fiber                 | H <sub>2</sub> SO <sub>4</sub> , HNO <sub>3</sub> treatment, stirring                | —                 | 18        |
| Graphene                     | Electro-beam lithography                                                             | —                 | S16       |
| Fullerene (C <sub>60</sub> ) | Ruthenium-catalysed at 1200 K                                                        | —                 | 20        |
| Carbon nanotubes             | Two-step electrochemical treatment                                                   | 5.1-6.3           | 19        |
| Graphite rod                 | Electrochemical exfoliation                                                          | 1.8               | 16        |
| Graphite                     | Microwave irradiation, sonicating, H <sub>2</sub> SO <sub>4</sub> , HNO <sub>3</sub> | 20                | 17        |
| Graphene                     | Electrochemical oxidation,                                                           | —                 | S17       |
| GO                           | Microwave irradiation, reflux                                                        | 8.5               | S18       |
| Carbon black                 | HNO <sub>3</sub> reflux                                                              | 1.7-3.5           | S19       |
| GO                           | Hydrothermal treatment at 70–150 °C                                                  | 19-29             | 22        |
| GO                           | Hydrothermal treatment at 120 °C, H <sub>2</sub> O <sub>2</sub>                      | 1-10              | S20       |
| Graphite                     | Hydrothermal treatment at 200 °C                                                     | 7-12.7            | S21       |
| Alginate                     | Pyrolysis and laser irradiation                                                      | —                 | 24        |
| Pyrene                       | Hydrothermal treatment at 200 °C                                                     | 23                | 6         |
| Methane                      | Chemical Vapor Deposition                                                            | —                 | 25        |
| Benzene derivatives          | Oxidative condensation reactions                                                     | —                 | 29        |
| Citric acid                  | Hydrothermal treatment at 200 °C                                                     | 2.2               | 30        |
| Glucose                      | Microwave-assisted hydrothermal                                                      | 7-11              | 26        |
| Polythiophene derivatives    | Hydrothermal treatment at 170 °C                                                     | —                 | 28        |
| Hexabenzocoronene            | Pyrolysis at 1200 °C and exfoliation                                                 | 3.8               | 27        |
| Benzoquinone                 | Chemical synthesis with TETA                                                         | 17.5-35.3         | 5         |
| Dead neem leaves             | H <sub>2</sub> SO <sub>4</sub> , HNO <sub>3</sub> treatment,                         | 2                 | 34        |
| Rice husk                    | Ultrasonic treatment                                                                 | 8.1               | 33        |
| Alkali lignin                | Two-step method                                                                      | 22                | Our work  |

## Supplementary References

- S1 S. Sahu, B. Behera, T. K. Maiti, S. Mohapatra, *Chem. Commun.*, 2012, **48**, 8835–8837.
- S2 Z.-C. Yang, M. Wang, A. M. Yong, S. Y. Wong, X. H. Zhang, H. Tan, A. Y. Chang, X. Li, J. Wang, *Chem. Commun.*, 2011, **47**, 11615–11617.
- S3 S. Liu, J. Tian, L. Wang, Y. Zhang, X. Qin, Y. Luo, A. M. Asiri, A. O. Al-Youbi, X. Sun, *Adv. Mater.*, 2012, **24**, 2037–2041.
- S4 Z. Liang, L. Zeng, X. Cao, Q. Wang, X. Wang, R. Sun, *J Mater. Chem. C*, 2014, **2**, 9760–9766.
- S5 M. Xu, Q. Huang, R. Sun, X. Wang, *RSC Adv.* 2016, **6**, 88674–88682.
- S6 S. Ray, A. Saha, N. R. Jana, R. Sarkar, *J. Phys. Chem. C*, 2009, **113**, 18546–18551.
- S7 J. Zhou, Z. Sheng, H. Han, M. Zou, C. Li, *Mater. Lett.*, 2012, **66**, 222–224.
- S8 M. Xue, Z. Zhan, M. Zou, L. Zhang, S. Zhao, *New J. Chem.*, 2016, **40**, 1698–1703.
- S9 J. Wei, X. Zhang, Y. Sheng, J. Shen, P. Huang, S. Guo, J. Pan, B. Liu, B. Feng, *New J. Chem.*, 2014, **38**, 906–909.
- S10 C. Zhu, J. Zhai, S. Dong, *Chem. Commun.*, 2012, **48**, 9367–9369.
- S11 R. Purbia, S. Paria, *Biosens. Bioelectron.*, 2016, **79**, 467–475.
- S12 C. Jiang, H. Wu, X. Song, X. Ma, J. Wang, M. Tan, *Talanta*, 2014, **127**, 68–74.
- S13 X. Sun, J. Tuo, W. Yang, D. Yang. *Nano Report*, 2015, **2**, 51–54
- S14 W. Chen, C. Hu, Y. Yang, J. Cui, Y. Liu, *Materials* 2016, **9**, 184.
- S15 L. Ponomarenko, F. Schedin, M. Katsnelson, R. Yang, E. Hill, K. Novoselov, A. Geim, *Science*, 2008, **320**, 356–358..
- S16 Y. Li, Y. Zhao, H. Cheng, Y. Hu, G. Shi, L. Dai, L. Qu, *J. Am. Chem. Soc.*, 2011, **134**, 15–18.
- S17 H. Sun, L. Wu, N. Gao, J. Ren, X. Qu, *ACS Appl. Mater. Interfaces*, 2013, **5**, 1174–1179.
- S18 S. Yang, C. Zhu, J. Sun, P. He, N. Yuan, J. Ding, G. Ding, X. Xie, *RSC Adv.*, 2015, **5**, 33347–33350.
- S19 T. Gao, X. Wang, L.-Y. Yang, H. He, X.-X. Ba, J. Zhao, F.-L. Jiang, Y. Liu, *ACS Appl. Mater. Interfaces*, 2017, **9**, 24846–24856.
- S20 C. C. Ke, Y. C. Yang, W. L. Tseng, *Part. Part. Syst. Char.*, 2016, **33**, 132–139.
- S21 W. Kwon, Y. H. Kim, C. L. Lee, M. Lee, H. C. Choi, T. W. Lee, S. W. Rhee, *Nano Lett.*, 2014, **14**, 1306–1311.
